# Supplementary material for: Determination of boron in aqueous solution using a method combining laser ablation molecular isotopic spectrometry with molecular laser-induced fluorescence and isotopic dilution
Source: Royal Society of Chemistry journal article supplement (doi:10.1039/d0ja00430h), 2021-01-01
Supplement: d0ja00430h1.pdf [file d0ja00430h1.pdf]

**Electronic Supplementary Information for JAAS publication:**

**Determination of boron in aqueous solution using a  
method combining laser ablation molecular isotopic  
spectrometry with molecular laser-induced  
fluorescence and isotopic dilution**

*Kun Liu, Ran Zhou, Wen Zhang, Zhiyang Tang, Qingzhou Li, Chenwei Zhu, Chao He,  
Xiangyou Li\* and Xiaoyan Zeng*

Wuhan National Laboratory for Optoelectronics (WNLO), Huazhong University of  
Science and Technology (HUST), Wuhan, Hubei 430074, P. R. China

\*Phone: 86-27-87541423. Fax: +86-27-87541423. E-mail: xyli@mail.hust.edu.cn

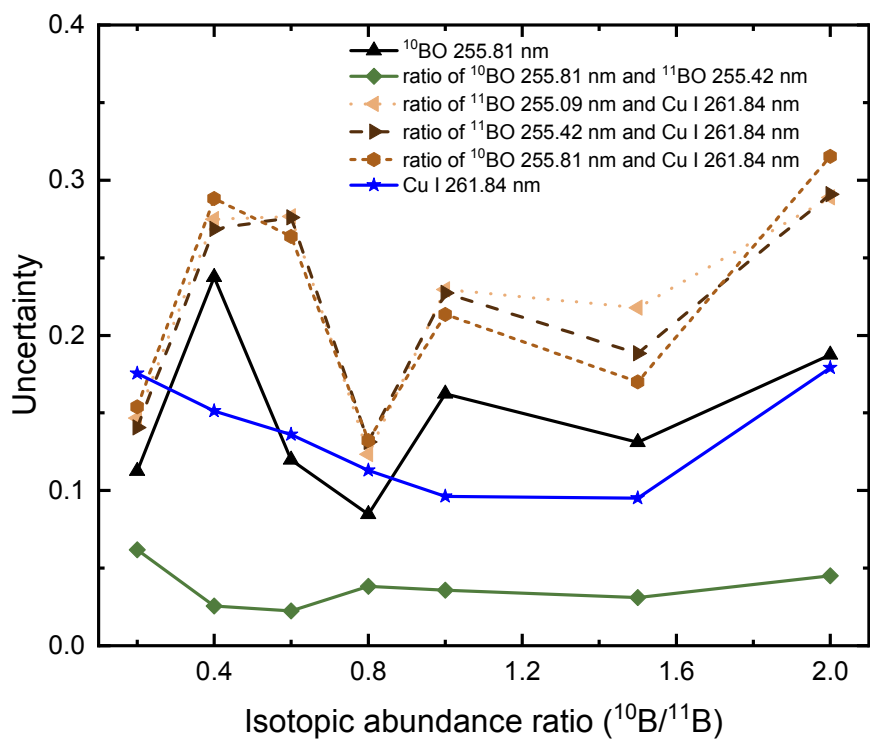

Figure S1 Uncertainty of fluorescence intensities and fluorescence ratio.

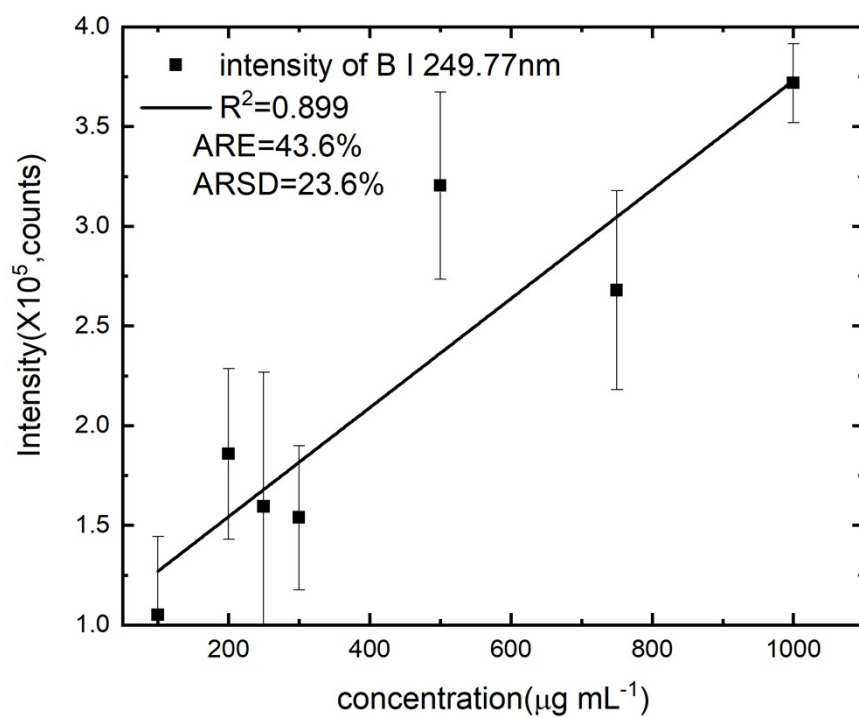

Figure S2 Calibration curve of B I 249.77nm.
